# Supplementary material for: Functional Characterization of Promoter Variants of the Adiponectin Gene Complemented by Epidemiological Data
Source: Oxford University Press journal article supplement (doi:10.2337/db07-1646), 2008-12-15

**Supplemental material**

**Table S1:** Sequences of primers used for cloning of luciferase reporter vectors and for amplification of band shift probes from the respective luciferase reporter vector carrying the respective SNP variation combination.

| **Primers used** | **Sequenz 5´-3´** |
| --- | --- |
| apm1for | GAGGGGTGAAGGGCATGAGGAATTAGAAAGCAT |
| apm1rev | CCCTCTGGTATGGAATCAGAACCACAGACTGCA |
| P-11426G>A | CCCTTGCTGGGGTCGTAGTTTAATTCATCAGAATG |
| P-11391A>G | TGGCTTGCAAGAACCAGCTCAGATCCTGCCC |
| -11391&-11377 | TGGCTTGCAAGAACCAGCTCAGATCCTGCGCTTCAAAAAC |
| P-11377 G>C | AACCGGCTCAGATCCTGCGCTTCAAAAACAAAACATG |
| PAdp2125 | TGGCTTGCAAGAACCAGCTCAGATCCTGCGC |
| EMSA-5’ | GCGAAGCTTATCCTAAGCCCTTGCTGGG |
| EMSA-3’ | GCGAAGCTTGGCACGCTCATGTTTTGTT |

**Table S2:** Primer combinations that have been used for cloning of the MMM luciferase construct or for mutagenesis of the different SNP combinations into this vector.

| **Construct** | **Primer** |
| --- | --- |
| mmm-luc | PAdp2125 |
| MMM-luc | apM1for and apm1rev |
| mMM-luc | P-11426G>A |
| Mmm-luc | -11391&-11377 |
| MmM-luc | P-11391A>G |
| mMm-luc | P-11426G>A and P-11377 G>C |
| MMm-luc | P-11377 G>C |
| mmM-luc | P-11426G>A and P-11391A>G |


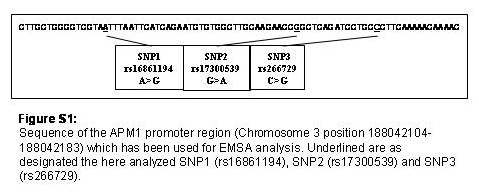

Supplement: db07-16462_suppl.doc [file db07-16462_suppl.doc]
